# Supplementary material
Source: publisher site journal article supplement (https://static.cambridge.org/content/id/urn:cambridge.org:id:article:S0007114520000562/resource/name/S0007114520000562supp003.pdf)

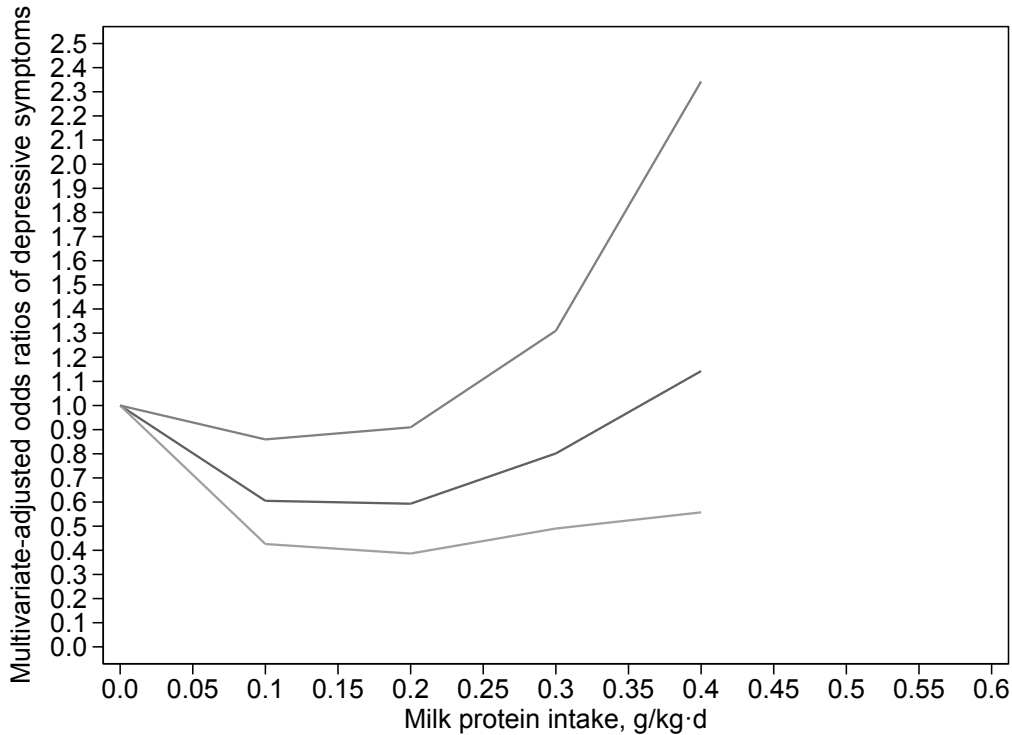

Supplement: Supplementary file 1 [file S0007114520000562supp003.pdf]
